# Supplementary material for: A Universal Proximity CRISPR Cas12a Assay for Ultrasensitive Detection of Nucleic Acids and Proteins
Source: bioRxiv or medRxiv preprint supplement (doi:10.1101/734582), 2019-08-13
Supplement: Supplementary file [file media-1.pdf]

# **A Universal Proximity CRISPR Cas12a Assay for Ultrasensitive Detection of Nucleic Acids and Proteins**

Yongya Li, Hayam Mansour, Yanan Tang, and Feng Li\*

**1. Materials.** EnGen Lba Cas12a (Cpf1), 10 × NEBuffer™ 2.1 Buffer, Klenow Fragment (3'→5' exo-), 10 × NEBuffer™ 2, Deoxynucleotide (dNTP) Solution Mix, nicking endonuclease (Nb.BbvCI) were purchased from New England Biolabs Ltd. (Whitby, ON, Canada). Anti-biotin antibodies were purchased from Thermo fisher Scientific (Mississauga, ON, Canada). Human serum, magnesium chloride hexahydrate (MgCl<sub>2</sub>·6H<sub>2</sub>O), and 100×Tris–EDTA (TE, pH 7.4) buffer were purchased from Sigma-Aldrich (Mississauga, ON, Canada). NANOpure H<sub>2</sub>O (> 18.0 MΩ), purified using an Ultrapure Mili-Q water system, was used for all experiments. All DNA samples and the guide RNAs were purchased from Integrated DNA Technologies (Coralville, IA) and purified using high-performance liquid chromatography. The DNA and RNA sequences are outlined in Table S1.

**Table S1. DNA sequences and modifications.**

| Name                          | Sequence (5'→3')                                                                         |
|-------------------------------|------------------------------------------------------------------------------------------|
| <b>Nucleic Acid Detection</b> |                                                                                          |
| P2 (Template)                 | GCT TGT GGC CG TTTA CGT CGC CGT CCA GCT CGA CCTCAGC CGTAGA TT GAC TCT GGC TTT-Invt       |
| P1 (Primer)                   | ATC TCT CTG AAG TT TCTACG                                                                |
| Blocking DNA                  | TTT TTT CGTAGA <sup>c</sup>                                                              |
| Target                        | AAA AGA TAA CAA GAA AGAC AAA GCC AGA GTC CTT CAG AGA GA TAC AGA AAC TCT AAT TCA          |
| <b>Protein Detection</b>      |                                                                                          |
| P2' (Template)                | GCT TGT GGC CG TTTA CGT CGC CGT CCA GCT CGA CCTCAGC ATGCGTAGA TTT TTT TTT TTT-TTT-Biotin |
| P1' (Primer)                  | Biotin-TTT TTT TTT TTT TTT TCTACG                                                        |
| <b>CRISPR-Cas12a</b>          |                                                                                          |
| crRNA                         | UAA UUU CUA CUA AGU GUA GAU CGU CGC CGU CCA GCU CGA CC                                   |
| Signal Reporter               | FAM-TTATT-Quencher                                                                       |

**2. Nucleic acid detection using proximity CRISPR Cas12a assay.** For a typical test, a 50 µL reaction mixture contained 5 µL of 100 nM P1, 5 µL of 100 nM P2, 10 µL of varying concentrations of genetic target, 3.3 mmol of dNTPs, 5 units of Klenow Fragment and 0.5 unit of nicking endonuclease in 1X NEBuffer™ 2. The solution was incubated at 37 °C for 20 min. A 50 µL enzyme solution which contains 30 nM of Cas12a, 30 nM of gRNA and 60 nM of signal reporter in 1× NEBuffer™ 2.1 was added. Fluorescence was measured immediately after transferring the reaction mixture to a 96-well microplate and kept measuring every 30s for 2 hours at 37 °C using a SpectraMax i3 multi-mode microplate reader (Molecular Devices) with excitation/emission at 485/515 nm.

**3. Proximity CRISPR Cas12a assay with blocking DNA.** 5 µL of 100 nM P1, 5 µL of 100 nM P2, 5 µL of 200 nM blocking DNA and 10 µL of genetic target with varying concentrations were incubated at 37 °C for 30 min. This reaction mixture was then added with 3.3 mmol of dNTPs, 5 unit of Klenow Fragment and 0.5 unit of nicking endonuclease in 1X NEBuffer™ 2 to a final volume of 50 µL. The solution was incubated at 37 °C for another 20 min. A 50 µL enzyme solution containing 30 nM of Cas12a, 30 nM of gRNA and 60 nM of signal reporter in 1× NEBuffer™ 2.1 was added. Fluorescence was measured immediately after transferring the reaction mixture to a 96-well microplate and kept measuring every 30s for 2 hours at 37 °C.

**4. Antibody detection using proximity CRISPR Cas12a assay.** For a typical test, 5 µL of 100 nM P1', 5 µL of 100 nM P2' and 10 µL of varying concentrations of antibody were first mixed and incubated at 37 °C for 30 min. A 30 µL enzyme solution containing 3.3 mmol of dNTPs, 5 unit of DNA Polymerase (Klenow Fragment) and 0.5 unit of nicking endonuclease (Nb.BbvCI) in 1X NEBuffer™ 2 was then added. The solution was incubated at 37 °C for 20 min. Another 50 µL enzyme solution containing 30 nM of Cas12a, 30 nM of gRNA and 60 nM of signal reporter in 1× NEBuffer™ 2.1 was added. Fluorescence was measured immediately after transferring the reaction mixture to a 96-well microplate and kept measuring every 30s for 2 hours at 37 °C.

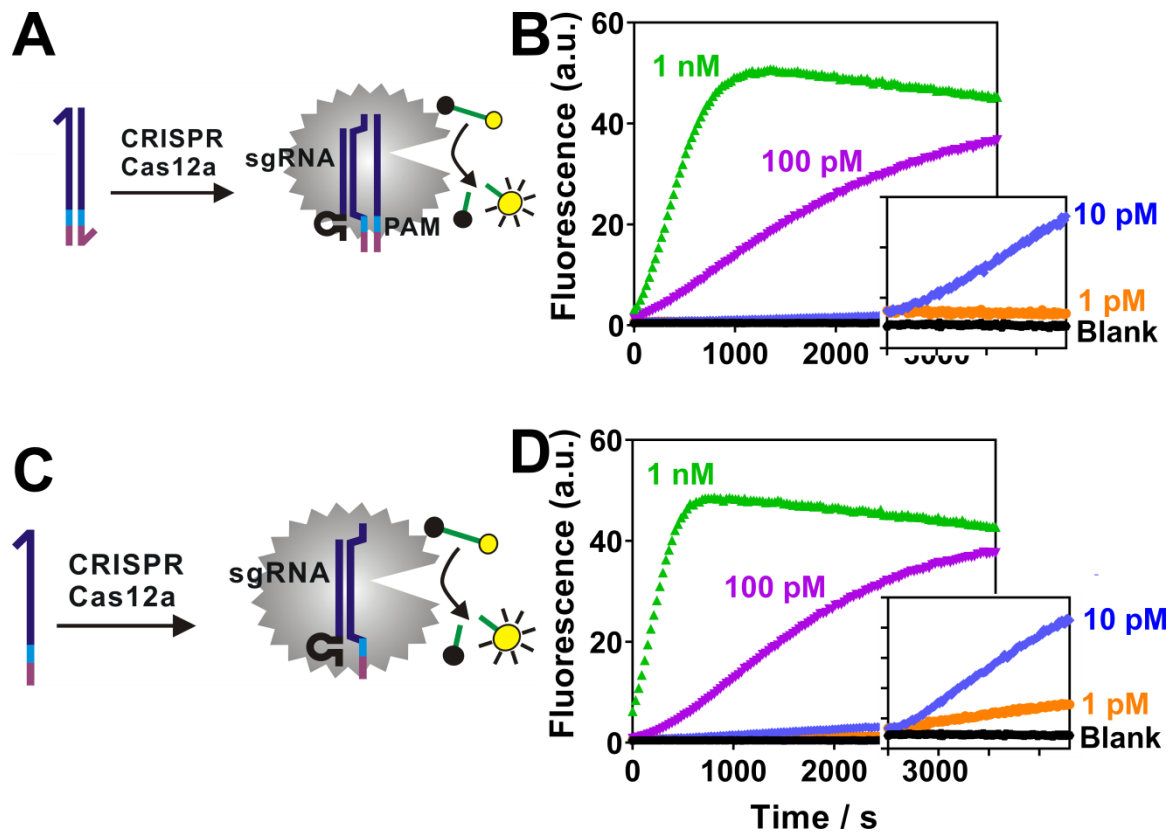

**Figure S1.** Direct detection of double-stranded DNA (dsDNA) (**A**, **B**) or single-stranded DNA (ssDNA) (**C**, **D**) using direct CRISPR RNA (crRNA) recognition and Cas12a cleavage. The limit of detection (LOD) was determined to be 10 pM for dsDNA (**B**) and 1 pM for ssDNA (**D**).

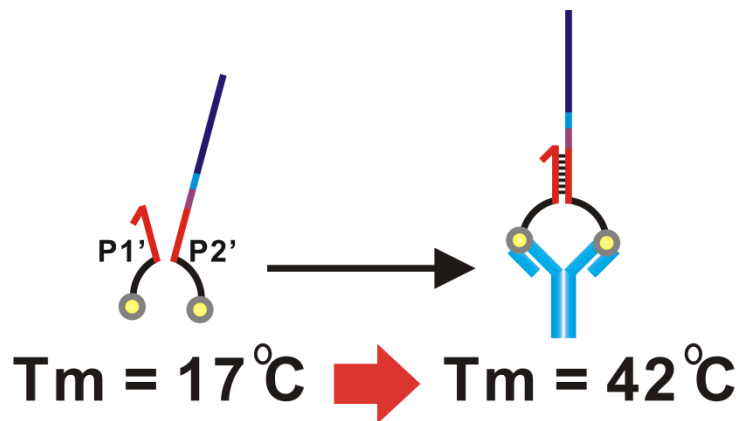

**Figure S2.** Estimated melting temperature ( $T_m$ ) between P1' and P2' in the absence or presence of the target antibody. In absence of the target antibody, the estimated  $T_m = 17^{\circ}\text{C}$  by NuPack, suggesting that P1' and P2' do not hybridize at  $37^{\circ}\text{C}$ . In the presence of the target, the affinity binding to the target protein brings P1' and P2' into proximity, leading to the formation of a stable duplex with an estimated  $T_m$  of  $42^{\circ}\text{C}$ .

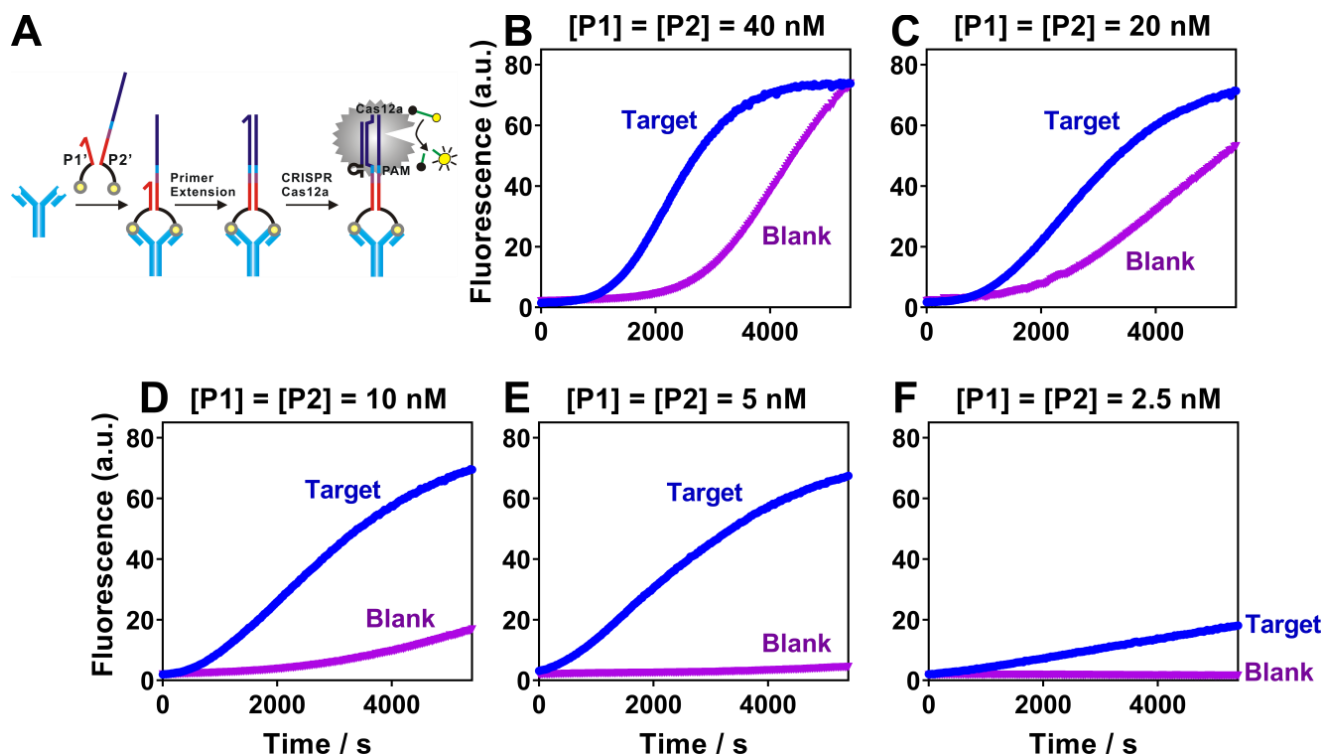

**Figure S3.** Optimization of the concentrations of proximity probes P1' and P2' for protein analysis. **(A)** Schematic illustration of the detection of protein using a binding-induced primer extension and then CRISPR Cas12a amplification. **(B-F)** Binding-induced primer extension using varying concentrations of P1' and P2' from 40 nM to 2.5 nM. The optimal concentration of P1' and P2' is 5 nM as it maximizes the target-dependent fluorescence signal and minimizes background signal. [Anti-biotin] = 5 nM, [Polymerase] = 1 U.

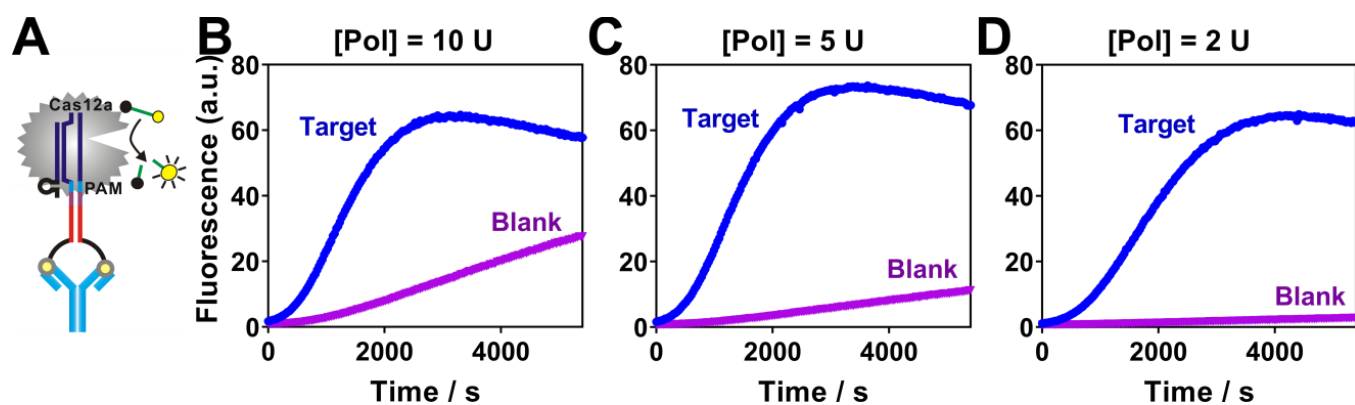

**Figure S4.** Optimization of the concentrations of DNA polymerase (Klenow Fragment, unit) for protein analysis.

(A) The detection of protein was achieved using a binding-induced primer extension and then CRISPR Cas12a amplification. (B-D) Detection of anti-biotin antibody using varying concentrations of DNA polymerase. The optimal amount of Klenow Fragment was found to be 5 units, as it maximizes detection signals and kinetics while maintains a reasonably low background. [Anti-biotin] = 5 nM, [P1'] = [P2'] = 5 nM.

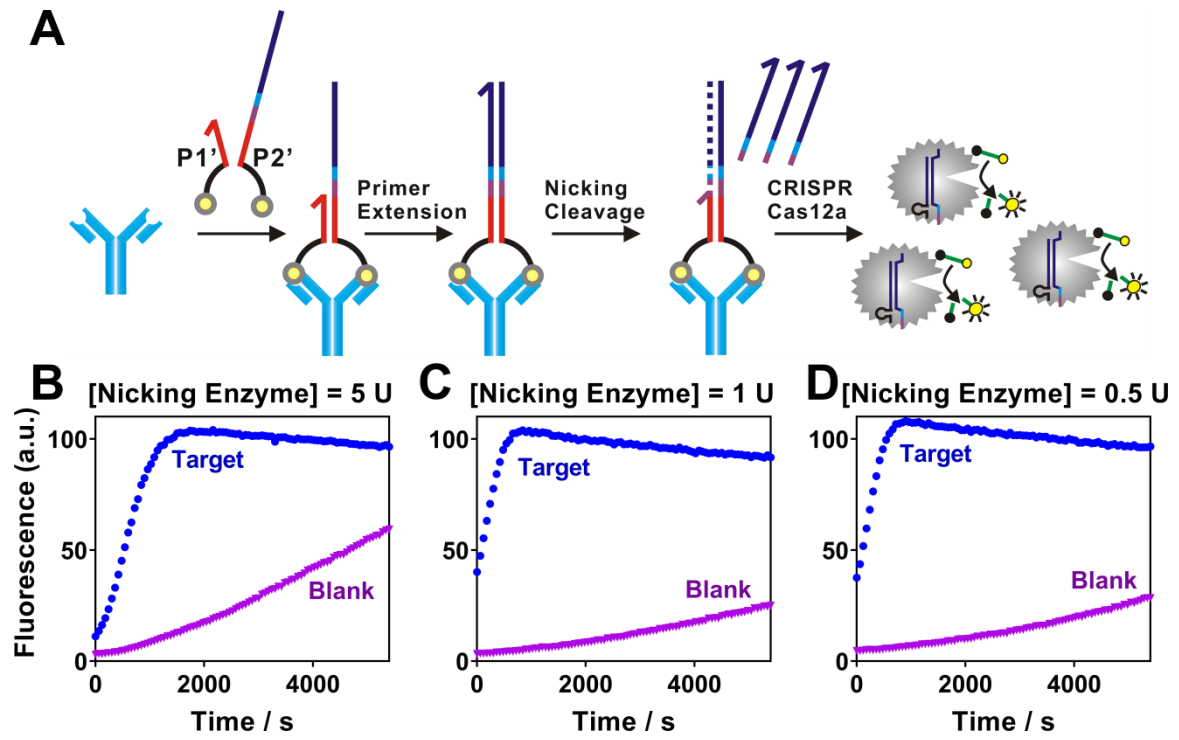

**Figure S5.** Optimization of nicking endonuclease for the proximity CRISPR Cas12a assay. **(A)** Schematic illustration of antibody detection using proximity CRISPR Cas12a combined with nicking cleavage. **(B-D)** Detection of anti-biotin antibody using varying concentrations of nicking endonuclease from 0.5 U to 5 U. The optimal amount of nicking endonuclease was found to be 0.5 units, as it maximizes detection signals and minimizes the background. [Anti-biotin] = 5 nM, [P1'] = [P2'] = 5 nM, [Polymerase] = 5 U.
